# Supplementary material
Source: Springer Nature journal article supplement (https://www.springermedizin.de/resource/supplementary/12887_2012_701_MOESM3_ESM.pdf/9475488)

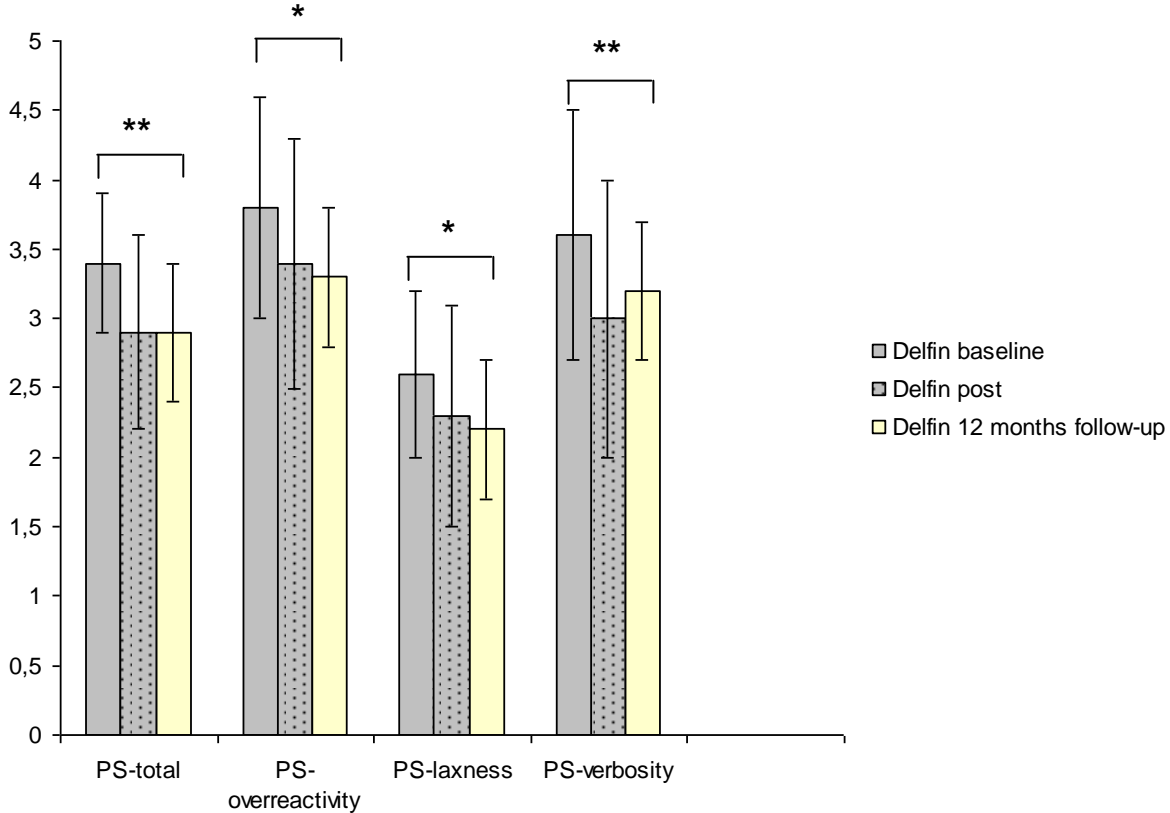

Supplement: MOESM3 [file 9475488]
